# Supplementary material for: A nonsense mutation of human XRCC4 is associated with adult-onset progressive encephalocardiomyopathy
Source: PubMed Central journal article supplement (PMC4520657; doi:10.15252/emmm.201404803), 2015-04-14
Supplement: emmm0007-0918-sd2.pdf [file emmm0007-0918-sd2.pdf]

## A nonsense mutation of human XRCC4 is associated with adult-onset progressive encephalomyopathy

Leonardo Bee et al.

### Supplementary information

Supplementary information includes 1 Table and 2 Figures

### Supplementary Table S1

| Chr | Position  | Ref | Alt | Genes  | Transcript   | cDNA      | Protein | SIFT       | PolyPhen2    | Taster  | Score* | EVS % |
|-----|-----------|-----|-----|--------|--------------|-----------|---------|------------|--------------|---------|--------|-------|
| 5   | 82500668  | C   | T   | XRCC4  | NM_003401    | c.673C>T  | p.R225X | Damaging   | Damaging     | disease | 3      | 0,00  |
| 16  | 11935849  | C   | G   | RSL1D1 | NM_015659    | c.644G>C  | p.R215P | Damaging   | Possibly dam | disease | 2,5    | 0,00  |
| 19  | 10132007  | T   | A   | RDH8   | NM_015725    | c.613T>A  | p.F225I | Damaging   | Possibly dam | disease | 2,5    | 0,00  |
| 19  | 9492071   | T   | G   | ZNF177 | NM_001172651 | c.584T>G  | p.L195R | Damaging   | Probably dam | polim   | 2      | 0,02  |
| 19  | 10475315  | G   | A   | TYK2   | NM_003331    | c.1342C>T | p.R448W | Damaging   | Possibly dam | polim   | 1,5    | 0,01  |
| 5   | 139715520 | G   | A   | HBEGF  | NM_001945    | c.491C>T  | p.A164V | Tolerated  | Benign       | disease | 1      | 0,00  |
| 19  | 36368996  | T   | A   | APLP1  | NM_001024807 | c.1562T>A | p.M521K | Activating | Benign       | polim   | 1      | 0,03  |
| X   | 9679796   | G   | A   | TBL1X  | NM_001139468 | c.1585G>A | p.V529I | Tolerated  | Benign       | disease | 1      | 0,00  |
| 5   | 81549231  | G   | A   | ATG10  | NM_031482    | c.650G>A  | p.R217Q | Tolerated  | Benign       | polim   | 0      | 0,00  |
| X   | 106486493 | A   | G   | PIH1D3 | NM_173494    | c.610A>G  | p.M204V | Tolerated  | Benign       | polim   | 0      | 0,00  |

\* Arbitrary score from the prediction softwares (Damaging, Disease=1; Probably or possibly damaging=0.5; Benign, tolerated=0)
